# Supplementary material
Source: PubMed Central journal article supplement (PMC2990351)
Supplement: NIHMS238323-supplement-1_si_001.pdf [file NIHMS238323-supplement-1_si_001.pdf]

**Supplemental Table 1.** List of Proteins with Detected Cysteine-SOH Modifications (excluding those identified in proteomic screens). Each referenced entry indicates the species, particular cysteine residue modified (if known), oxidative treatment that accompanied detection and the methodology employed.

| Protein Name          | Species                | Cysteine | Detection Method(s) <sup>#</sup> | Oxidant Treatment(s)                                            | Reference |
|-----------------------|------------------------|----------|----------------------------------|-----------------------------------------------------------------|-----------|
| 1-Cys OxyR            | <i>D. radiodurans</i>  | 210      | N                                | cumene-hydroperoxide                                            | (1)       |
| 1-Cys Prx             | <i>B. taurus</i>       |          | T                                | hydrogen peroxide, peroxyxynitrite                              | (2)       |
| 20S Proteasome        | <i>S. cerevisiae</i>   |          | N                                | hydrogen peroxide                                               | (3)       |
| 20S Proteasome        | <i>S. cerevisiae</i>   |          | N                                | hydrogen peroxide                                               | (4)       |
| Actin                 | <i>H. sapiens</i>      |          | D                                | hydrogen peroxide                                               | (5)       |
| Actin                 | <i>H. sapiens</i>      |          | D, SR                            | no treatment                                                    | (6)       |
| Actin                 | <i>R. norvegicus</i>   | 217      | MS, SR                           | no treatment, x-ray irradiation                                 | (7)       |
| Alcohol Dehydrogenase | <i>S. cerevisiae</i>   |          | DR                               | hydrogen peroxide                                               | (8)       |
| AhpC (C165S)          | <i>S. typhimurium</i>  | 46       | N                                | peroxyxynitrite                                                 | (9)       |
| AhpC (C165S)          | <i>S. typhimurium</i>  | 46       | N                                | hydrogen peroxide                                               | (10)      |
| AhpC (C165S)          | <i>S. typhimurium</i>  | 46       | T                                | hydrogen peroxide                                               | (11)      |
| AhpC (C165S)          | <i>S. typhimurium</i>  | 46       | DR                               | hydrogen peroxide                                               | (12)      |
| AhpC (C165S)          | <i>S. typhimurium</i>  | 46       | DR                               | hydrogen peroxide                                               | (13)      |
| AhpE                  | <i>M. tuberculosis</i> | 45       | T                                | hydrogen peroxide                                               | (14)      |
| AhpE                  | <i>M. tuberculosis</i> | 45       | X                                | no treatment                                                    | (15)      |
| Akt1                  | <i>H. sapiens</i>      | 310      | MS                               | no treatment, hydrogen peroxide                                 | (16)      |
| Albumin               | <i>B. taurus</i>       | 34       | SR                               | hydrogen peroxide                                               | (17)      |
| Albumin               | <i>B. taurus</i>       | 34       | SR                               | hydrogen peroxide, xanthine oxidase                             | (18)      |
| Albumin               | <i>H. sapiens</i>      | 34       | DR                               | hydrogen peroxide                                               | (8)       |
| Albumin               | <i>H. sapiens</i>      | 34       | D                                | nitric oxide (anaerobic)                                        | (19)      |
| Albumin               | <i>B. taurus</i>       | 34       | N                                | hydrogen peroxide + bicarbonate                                 | (20)      |
| Albumin               | <i>B. taurus</i>       | 34       | N                                | hydrogen peroxide + nitrite,<br>hydrogen peroxide + bicarbonate | (21)      |
| Albumin               | <i>H. sapiens</i>      | 34       | N                                | taurine chloramine                                              | (22)      |
| Albumin               | <i>H. sapiens</i>      | 34       | T                                | hydrogen peroxide                                               | (23)      |
| Albumin               | <i>H. sapiens</i>      | 34       | N, D                             | hydrogen peroxide, peroxyxynitrite                              | (24)      |
| Aldose Reductase      | <i>H. sapiens</i>      | 298      | D                                | peroxyxynitrite                                                 | (25)      |

|                                             |                              |                  |       |                                       |      |
|---------------------------------------------|------------------------------|------------------|-------|---------------------------------------|------|
| Aldose Reductase                            | <i>H. sapiens</i>            | 298, 303         | D     | hydrogen peroxide                     | (26) |
| Aldose Reductase                            | <i>R. norvegicus</i>         | 80, 92, 298, 303 | D, MS | ischemia                              | (26) |
| Alpha1 Antitrypsin                          | <i>H. sapiens</i>            | 232              | N     | hydrogen peroxide                     | (27) |
| Arylamine N-acetyltransferase               | <i>H. sapiens</i>            | 68               | D     | hydrogen peroxide                     | (28) |
| Bacterioferritin Comigratory Protein (C50S) | <i>E. coli</i>               | 45               | N     | hydrogen peroxide                     | (29) |
| Bacterioferritin Comigratory Protein        | <i>E. coli</i>               | 45               | N     | no treatment                          | (30) |
| Betaine Aldehyde Dehydrogenase              | <i>P. aeruginosa</i>         | 286              | X     | no treatment                          | (31) |
| Calreticulin                                | <i>H. sapiens</i>            |                  | DR    | no treatment                          | (32) |
| Cathepsin K                                 | <i>H. sapiens</i>            | 25               | D     | NOR-1 (nitric oxide donor)            | (33) |
| CDC25B Phosphatase (C426S)                  | <i>H. sapiens</i>            | 473              | MS    | hydrogen peroxide                     | (34) |
| Cytosolic Branched Chain Aminotransferase   | <i>H. sapiens</i>            | 335              | D     | hydrogen peroxide                     | (35) |
| Formylglycine Generating Enzyme             | <i>H. sapiens</i>            | 336              | X     | no treatment                          | (36) |
| Glutathione Reductase                       | <i>H. sapiens</i>            | 63               | X     | S-nitrosoglutathione                  | (37) |
| Glutathione S Transferase (microsomal)      | <i>R. norvegicus</i>         | 49               | SR    | peroxynitrite                         | (38) |
| Glutathione S Transferase (mitochondrial)   | <i>R. norvegicus</i>         |                  | SR    | gallic acid                           | (39) |
| GAPDH                                       | <i>O. cuniculus</i>          | 149              | BA    | o-iodosobenzoate                      | (40) |
| GAPDH                                       | <i>S. domestica</i>          | 149              | D, DR | o-iodosobenzoate                      | (41) |
| GAPDH                                       | <i>O. cuniculus</i>          | 149              | SR    | hydrogen peroxide                     | (42) |
| GAPDH                                       | <i>S. domestica</i>          | 149              | SR    | o-iodosobenzoate, iodine monochloride | (43) |
| GAPDH (C153S)                               | <i>B. stearothermophilus</i> | 149              | SR    | hydrogen peroxide                     | (44) |
| GAPDH                                       | <i>S. domestica</i>          | 149              | SR    | trinitroglycerin                      | (45) |
| GAPDH                                       | <i>H. sapiens</i>            |                  | DR    | no treatment, hydrogen peroxide       | (32) |
| GAPDH                                       | <i>O. cuniculus</i>          | 149              | D     | hydrogen peroxide                     | (5)  |
| GAPDH                                       | <i>H. sapiens</i>            | 152              | D     | hydrogen peroxide                     | (5)  |
| Gpx3/Orp1                                   | <i>S. cerevisiae</i>         | 36               | DR    | hydrogen peroxide                     | (46) |
| Gpx3/Orp1 (C64S,C82S)                       | <i>S. cerevisiae</i>         | 36               | N     | hydrogen peroxide                     | (47) |
| Hemoglobin (beta chain)                     | <i>H. sapiens</i>            | 93               | D, MS | hydrogen peroxide                     | (48) |
| hORF6                                       | <i>H. sapiens</i>            | 47               | X     | no treatment                          | (49) |

|                                                       |                            |     |       |                                             |      |
|-------------------------------------------------------|----------------------------|-----|-------|---------------------------------------------|------|
| IgG1                                                  | <i>H. sapiens</i>          | 231 | MS    | hydrogen peroxide                           | (50) |
| Ikappa B Kinase (beta subunit)                        | <i>M. musculus</i>         | 179 | D     | hydrogen peroxide                           | (51) |
| Malate Synthase G                                     | <i>E. coli</i>             | 617 | X     | no treatment                                | (52) |
| Methionine Sulfoxide Reductase A (C86S,C198S,C206S)   | <i>E. coli</i>             | 51  | T     | hydrogen peroxide, methionine sulfoxide     | (53) |
| Methionine Sulfoxide Reductase A (C198S)              | <i>N. meningitis</i>       | 51  | X     | no treatment                                | (54) |
| Methionine Sulfoxide Reductase B                      | <i>D. melanogaster</i>     | 124 | D     | methionine sulfoxide                        | (55) |
| Methionine Sulfoxide Reductase B (C31S)               | <i>X. campestris</i>       | 117 | T     | no treatment                                | (56) |
| Methionine Sulfoxide Reductase B1                     | <i>A. thaliana</i>         | 186 | MS    | methionine sulfoxide                        | (57) |
| Mitochondrial Branched Chain Aminotransferase (C318A) | <i>H. sapiens</i>          | 315 | MS, D | hydrogen peroxide                           | (58) |
| Mitochondrial 1-Cys Prx                               | <i>S. cerevisiae</i>       | 91  | MS    | hydrogen peroxide                           | (59) |
| MKP-3 (C287S,C309S)                                   | <i>H. sapiens</i>          | 293 | MS    | hydrogen peroxide                           | (60) |
| NADPH Oxidase                                         | <i>L. sanfranciscensis</i> | 42  | X     | no treatment                                | (61) |
| NADH peroxidase                                       | <i>E. faecalis</i>         | 42  | NMR   | no treatment                                | (62) |
| NADH peroxidase                                       | <i>S. faecalis</i>         | 42  | T     | no treatment                                | (63) |
| NADH peroxidase                                       | <i>E. faecalis</i>         | 42  | X     | no treatment                                | (64) |
| NADH peroxidase                                       | <i>S. faecalis</i>         | 42  | X     | no treatment                                | (65) |
| Nitrile Hydratase                                     | <i>P. thermophilia</i>     | 113 | X     | no treatment                                | (66) |
| OhrR (C127S,C131S)                                    | <i>X. campestris</i>       | 22  | N     | cumene-hydroperoxide                        | (67) |
| OhrR                                                  | <i>B. subtilis</i>         | 15  | N, MS | cumene-hydroperoxide                        | (68) |
| OxyR                                                  | <i>E. coli</i>             | 199 | N     | hydrogen peroxide                           | (69) |
| NF-kappaB (p50 subunit)                               | <i>H. sapiens</i>          | 62  | D     | hydrogen peroxide                           | (70) |
| Papain                                                | <i>C. papaya</i>           | 25  | SR, T | hydrogen peroxide                           | (71) |
| Papain                                                | <i>C. papaya</i>           | 25  | DR    | hydrogen peroxide                           | (8)  |
| Papain                                                | <i>C. papaya</i>           | 25  | DR    | hydrogen peroxide                           | (13) |
| Papain                                                | <i>C. papaya</i>           | 25  | D     | hydrogen peroxide                           | (5)  |
| Papain                                                | <i>C. papaya</i>           | 25  | N     | hydrogen peroxide, tryptophan-hydroperoxide | (72) |
| PAPS reductase                                        | <i>E. coli</i>             |     | DR    | hydrogen peroxide                           | (8)  |
| PILB (C348S)                                          | <i>N. meningitis</i>       | 206 | T, D  | methionine sulfoxide                        | (73) |

|                                      |                            |         |       |                                       |      |
|--------------------------------------|----------------------------|---------|-------|---------------------------------------|------|
| Prx                                  | <i>A. pernix</i>           | 50      | X     | no treatment                          | (74) |
| Prx1                                 | <i>H. sapiens</i>          |         | DR    | hydrogen peroxide                     | (32) |
| Prx1                                 | <i>H. sapiens</i>          |         | D     | hydrogen peroxide                     | (5)  |
| Prx1                                 | <i>S. cerevisiae</i>       |         | D     | hydrogen peroxide                     | (75) |
| Protein Tyrosine Phosphatase 1B      | <i>H. sapiens</i>          | 215     | X     | no treatment                          | (76) |
| Rab1a                                | <i>H. sapiens</i>          | 26, 126 | DR    | hydrogen peroxide                     | (32) |
| S100A8                               | <i>M. musculus</i>         | 41      | MD, D | hypochlorous acid                     | (77) |
| SarZ                                 | <i>S. aureus</i>           | 13      | N, X  | cumene-hydroperoxide                  | (78) |
| S-Formylglutathione Hydrolase        | <i>S. cerevisiae</i>       | 60      | X     | no treatment                          | (79) |
| Shp1                                 | <i>M. musculus</i>         | 453     | DR    | phorbol myristate acetate + ionomycin | (80) |
| Shp2                                 | <i>M. musculus</i>         | 459     | DR    | phorbol myristate acetate + ionomycin | (80) |
| Sortase A                            | <i>S. pyogenes</i>         | 208     | X     | no treatment                          | (81) |
| Tetrachlorohydroquinone Dehalogenase | <i>S. chlorophenolicus</i> | 13      | D     | hydrogen peroxide                     | (82) |
| Thiocyanate Hydrolase                | <i>E. coli</i>             | 133     | X     | no treatment                          | (83) |
| Thiocyanate Hydrolase                | <i>T. thioparus</i>        | 133     | X     | no treatment                          | (84) |
| Thiol Peroxidase (C82S,C95S)         | <i>E. coli</i>             | 61      | N     | cumene-hydroperoxide                  | (85) |
| Tsa1 (C170S)                         | <i>S. cerevisiae</i>       |         | N     | hydrogen peroxide                     | (75) |
| Ulp1                                 | <i>S. cerevisiae</i>       | 580     | X     | no treatment                          | (86) |
| Vaccinia H1-Related Protein          | <i>H. sapiens</i>          | 124     | N     | hydrogen peroxide                     | (87) |
| YajL                                 | <i>E. coli</i>             | 106     | X     | no treatment                          | (88) |
| YbiS                                 | <i>E. coli</i>             | 186     | DR    | no treatment, hydrogen peroxide       | (89) |
| YhaK                                 | <i>E. coli</i>             | 122     | X     | no treatment                          | (90) |

Legend for Detection Methodology: N = 7-chloro-4-nitrobenzo-2-oxa-1,3-diazole (NBD-Cl), T = 5-thio-2-nitrobenzoate (TNB), D = 5,5-dimethyl-1,3-cyclohexanedione (Dimedone), SR = Selective Reduction, MS = Direct Mass Spectrometry, DR = Dimedone Derivatives, X = X-ray Crystal Structure, NMR = <sup>13</sup>C NMR, BA = benzylamine.

## References

1. Chen, H., Xu, G., Zhao, Y., Tian, B., Lu, H., Yu, X., Xu, Z., Ying, N., Hu, S., and Hua, Y. (2008) A novel OxyR sensor and regulator of hydrogen peroxide stress with one cysteine residue in *Deinococcus radiodurans*, *PLoS One* 3, e1602.
2. Peshenko, I. V., and Shichi, H. (2001) Oxidation of active center cysteine of bovine 1-Cys peroxiredoxin to the cysteine sulfenic acid form by peroxide and peroxynitrite, *Free Radic Biol Med* 31, 292-303.
3. Demasi, M., Silva, G. M., and Netto, L. E. (2003) 20 S proteasome from *Saccharomyces cerevisiae* is responsive to redox modifications and is S-glutathionylated, *J Biol Chem* 278, 679-685.
4. Silva, G. M., Netto, L. E., Discola, K. F., Piassa-Filho, G. M., Pimenta, D. C., Barcena, J. A., and Demasi, M. (2008) Role of glutaredoxin 2 and cytosolic thioredoxins in cysteinyl-based redox modification of the 20S proteasome, *FEBS J* 275, 2942-2955.
5. Seo, Y. H., and Carroll, K. S. (2009) Profiling protein thiol oxidation in tumor cells using sulfenic acid-specific antibodies, *Proc Natl Acad Sci U S A* 106, 16163-16168.
6. Johansson, M., and Lundberg, M. (2007) Glutathionylation of beta-actin via a cysteinyl sulfenic acid intermediary, *BMC Biochem* 8, 26.
7. Fedorova, M., Kuleva, N., and Hoffmann, R. (2010) Identification of cysteine, methionine and tryptophan residues of actin oxidized in vivo during oxidative stress, *J Proteome Res* 9, 1598-1609.
8. Reddie, K. G., Seo, Y. H., Muse Iii, W. B., Leonard, S. E., and Carroll, K. S. (2008) A chemical approach for detecting sulfenic acid-modified proteins in living cells, *Mol Biosyst* 4, 521-531.
9. Bryk, R., Griffin, P., and Nathan, C. (2000) Peroxynitrite reductase activity of bacterial peroxiredoxins, *Nature* 407, 211-215.
10. Ellis, H. R., and Poole, L. B. (1997) Novel application of 7-chloro-4-nitrobenzo-2-oxa-1,3-diazole to identify cysteine sulfenic acid in the AhpC component of alkyl hydroperoxide reductase, *Biochemistry* 36, 15013-15018.
11. Ellis, H. R., and Poole, L. B. (1997) Roles for the two cysteine residues of AhpC in catalysis of peroxide reduction by alkyl hydroperoxide reductase from *Salmonella typhimurium*, *Biochemistry* 36, 13349-13356.
12. Poole, L. B., Zeng, B. B., Knaggs, S. A., Yakubu, M., and King, S. B. (2005) Synthesis of chemical probes to map sulfenic acid modifications on proteins, *Bioconjug Chem* 16, 1624-1628.
13. Poole, L. B., Klomsiri, C., Knaggs, S. A., Furdui, C. M., Nelson, K. J., Thomas, M. J., Fetrow, J. S., Daniel, L. W., and King, S. B. (2007) Fluorescent and affinity-based tools to detect cysteine sulfenic acid formation in proteins, *Bioconjug Chem* 18, 2004-2017.
14. Hugo, M., Turell, L., Manta, B., Botti, H., Monteiro, G., Netto, L. E., Alvarez, B., Radi, R., and Trujillo, M. (2009) Thiol and sulfenic acid oxidation of AhpE, the one-cysteine peroxiredoxin from *Mycobacterium tuberculosis*: kinetics, acidity constants, and conformational dynamics, *Biochemistry* 48, 9416-9426.

15. Li, S., Peterson, N. A., Kim, M. Y., Kim, C. Y., Hung, L. W., Yu, M., Lakin, T., Segelke, B. W., Lott, J. S., and Baker, E. N. (2005) Crystal Structure of AhpE from *Mycobacterium tuberculosis*, a 1-Cys peroxiredoxin, *J Mol Biol* 346, 1035-1046.
16. Antico Arciuch, V. G., Galli, S., Franco, M. C., Lam, P. Y., Cadenas, E., Carreras, M. C., and Poderoso, J. J. (2009) Akt1 intramitochondrial cycling is a crucial step in the redox modulation of cell cycle progression, *PLoS One* 4, e7523.
17. Radi, R., Beckman, J. S., Bush, K. M., and Freeman, B. A. (1991) Peroxynitrite oxidation of sulfhydryls. The cytotoxic potential of superoxide and nitric oxide, *J Biol Chem* 266, 4244-4250.
18. Radi, R., Bush, K. M., Cosgrove, T. P., and Freeman, B. A. (1991) Reaction of xanthine oxidase-derived oxidants with lipid and protein of human plasma, *Arch Biochem Biophys* 286, 117-125.
19. DeMaster, E. G., Quast, B. J., Redfern, B., and Nagasawa, H. T. (1995) Reaction of nitric oxide with the free sulfhydryl group of human serum albumin yields a sulfenic acid and nitrous oxide, *Biochemistry* 34, 11494-11499.
20. Trindade, D. F., Cerchiaro, G., and Augusto, O. (2006) A role for peroxymonocarbonate in the stimulation of biothiol peroxidation by the bicarbonate/carbon dioxide pair, *Chem Res Toxicol* 19, 1475-1482.
21. Bonini, M. G., Fernandes, D. C., and Augusto, O. (2004) Albumin oxidation to diverse radicals by the peroxidase activity of Cu,Zn-superoxide dismutase in the presence of bicarbonate or nitrite: diffusible radicals produce cysteinyl and solvent-exposed and -unexposed tyrosyl radicals, *Biochemistry* 43, 344-351.
22. Peskin, A. V., and Winterbourn, C. C. (2006) Taurine chloramine is more selective than hypochlorous acid at targeting critical cysteines and inactivating creatine kinase and glyceraldehyde-3-phosphate dehydrogenase, *Free Radic Biol Med* 40, 45-53.
23. Turell, L., Botti, H., Carballal, S., Ferrer-Sueta, G., Souza, J. M., Duran, R., Freeman, B. A., Radi, R., and Alvarez, B. (2008) Reactivity of sulfenic acid in human serum albumin, *Biochemistry* 47, 358-367.
24. Carballal, S., Radi, R., Kirk, M. C., Barnes, S., Freeman, B. A., and Alvarez, B. (2003) Sulfenic acid formation in human serum albumin by hydrogen peroxide and peroxynitrite, *Biochemistry* 42, 9906-9914.
25. Kaiserova, K., Tang, X. L., Srivastava, S., and Bhatnagar, A. (2008) Role of nitric oxide in regulating aldose reductase activation in the ischemic heart, *J Biol Chem* 283, 9101-9112.
26. Kaiserova, K., Srivastava, S., Hoetker, J. D., Awe, S. O., Tang, X. L., Cai, J., and Bhatnagar, A. (2006) Redox activation of aldose reductase in the ischemic heart, *J Biol Chem* 281, 15110-15120.
27. Griffiths, S. W., King, J., and Cooney, C. L. (2002) The reactivity and oxidation pathway of cysteine 232 in recombinant human alpha 1-antitrypsin, *J Biol Chem* 277, 25486-25492.
28. Atmane, N., Dairou, J., Paul, A., Dupret, J. M., and Rodrigues-Lima, F. (2003) Redox regulation of the human xenobiotic metabolizing enzyme arylamine N-acetyltransferase 1 (NAT1). Reversible inactivation by hydrogen peroxide, *J Biol Chem* 278, 35086-35092.

29. Clarke, D. J., Mackay, C. L., Campopiano, D. J., Langridge-Smith, P., and Brown, A. R. (2009) Interrogating the molecular details of the peroxiredoxin activity of the Escherichia coli bacterioferritin comigratory protein using high-resolution mass spectrometry, *Biochemistry* 48, 3904-3914.
30. Jeong, W., Cha, M. K., and Kim, I. H. (2000) Thioredoxin-dependent hydroperoxide peroxidase activity of bacterioferritin comigratory protein (BCP) as a new member of the thiol-specific antioxidant protein (TSA)/Alkyl hydroperoxide peroxidase C (AhpC) family, *J Biol Chem* 275, 2924-2930.
31. Gonzalez-Segura, L., Rudino-Pinera, E., Munoz-Clares, R. A., and Horjales, E. (2009) The crystal structure of a ternary complex of betaine aldehyde dehydrogenase from Pseudomonas aeruginosa Provides new insight into the reaction mechanism and shows a novel binding mode of the 2'-phosphate of NADP+ and a novel cation binding site, *J Mol Biol* 385, 542-557.
32. Leonard, S. E., Reddie, K. G., and Carroll, K. S. (2009) Mining the thiol proteome for sulfenic acid modifications reveals new targets for oxidation in cells, *ACS Chem Biol* 4, 783-799.
33. Percival, M. D., Ouellet, M., Campagnolo, C., Claveau, D., and Li, C. (1999) Inhibition of cathepsin K by nitric oxide donors: evidence for the formation of mixed disulfides and a sulfenic acid, *Biochemistry* 38, 13574-13583.
34. Sohn, J., and Rudolph, J. (2003) Catalytic and chemical competence of regulation of cdc25 phosphatase by oxidation/reduction, *Biochemistry* 42, 10060-10070.
35. Conway, M. E., Coles, S. J., Islam, M. M., and Hutson, S. M. (2008) Regulatory control of human cytosolic branched-chain aminotransferase by oxidation and S-glutathionylation and its interactions with redox sensitive neuronal proteins, *Biochemistry* 47, 5465-5479.
36. Dierks, T., Dickmanns, A., Preusser-Kunze, A., Schmidt, B., Mariappan, M., von Figura, K., Ficner, R., and Rudolph, M. G. (2005) Molecular basis for multiple sulfatase deficiency and mechanism for formylglycine generation of the human formylglycine-generating enzyme, *Cell* 121, 541-552.
37. Becker, K., Savvides, S. N., Keese, M., Schirmer, R. H., and Karplus, P. A. (1998) Enzyme inactivation through sulfhydryl oxidation by physiologic NO-carriers, *Nat Struct Biol* 5, 267-271.
38. Imaizumi, N., Miyagi, S., and Aniya, Y. (2006) Reactive nitrogen species derived activation of rat liver microsomal glutathione S-transferase, *Life Sci* 78, 2998-3006.
39. Shinno, E., Shimoji, M., Imaizumi, N., Kinoshita, S., Sunakawa, H., and Aniya, Y. (2005) Activation of rat liver microsomal glutathione S-transferase by gallic acid, *Life Sci* 78, 99-106.
40. Allison, W. S., Benitez, L. V., and Johnson, C. L. (1973) The formation of a protein sulfenamide during the inactivation of the acyl phosphatase activity of oxidized glyceraldehyde-3-phosphate dehydrogenase by benzylamine, *Biochem Biophys Res Commun* 52, 1403-1409.

41. Benitez, L. V., and Allison, W. S. (1974) The inactivation of the acyl phosphatase activity catalyzed by the sulfenic acid form of glyceraldehyde 3-phosphate dehydrogenase by dimedone and olefins, *J Biol Chem* 249, 6234-6243.
42. Little, C., and O'Brien, P. J. (1969) Mechanism of peroxide-inactivation of the sulphhydryl enzyme glyceraldehyde-3-phosphate dehydrogenase, *Eur J Biochem* 10, 533-538.
43. Parker, D. J., and Allison, W. S. (1969) The mechanism of inactivation of glyceraldehyde 3-phosphate dehydrogenase by tetrathionate, o-iodosobenzoate, and iodine monochloride, *J Biol Chem* 244, 180-189.
44. Schmalhausen, E. V., Nagradova, N. K., Boschi-Muller, S., Branlant, G., and Mironetz, V. I. (1999) Mildly oxidized GAPDH: the coupling of the dehydrogenase and acyl phosphatase activities, *FEBS Lett* 452, 219-222.
45. You, K. S., Benitez, L. V., McConachie, W. A., and Allison, W. S. (1975) The conversion of glyceraldehyde-3-phosphate dehydrogenase to an acylphosphatase by trinitroglycerin and inactivation of this activity by azide and ascorbate., *Biochim Biophys Acta* 384, 317-330.
46. Paulsen, C. E., and Carroll, K. S. (2009) Chemical dissection of an essential redox switch in yeast, *Chem Biol* 16, 217-225.
47. Ma, L. H., Takanishi, C. L., and Wood, M. J. (2007) Molecular mechanism of oxidative stress perception by the Orp1 protein, *J Biol Chem* 282, 31429-31436.
48. Regazzoni, L., Panusa, A., Yeum, K. J., Carini, M., and Aldini, G. (2009) Hemoglobin glutathionylation can occur through cysteine sulfenic acid intermediate: electrospray ionization LTQ-Orbitrap hybrid mass spectrometry studies, *J Chromatogr B Analyt Technol Biomed Life Sci* 877, 3456-3461.
49. Choi, H. J., Kang, S. W., Yang, C. H., Rhee, S. G., and Ryu, S. E. (1998) Crystal structure of a novel human peroxidase enzyme at 2.0 Å resolution, *Nat Struct Biol* 5, 400-406.
50. Yan, B., Yates, Z., Balland, A., and Kleemann, G. R. (2009) Human IgG1 hinge fragmentation as the result of H<sub>2</sub>O<sub>2</sub>-mediated radical cleavage, *J Biol Chem* 284, 35390-35402.
51. Reynaert, N. L., van der Vliet, A., Guala, A. S., McGovern, T., Hristova, M., Pantano, C., Heintz, N. H., Heim, J., Ho, Y. S., Matthews, D. E., Wouters, E. F., and Janssen-Heininger, Y. M. (2006) Dynamic redox control of NF- $\kappa$ B through glutaredoxin-regulated S-glutathionylation of inhibitory  $\kappa$ B kinase beta, *Proc Natl Acad Sci U S A* 103, 13086-13091.
52. Anstrom, D. M., Kallio, K., and Remington, S. J. (2003) Structure of the Escherichia coli malate synthase G:pyruvate:acetyl-coenzyme A abortive ternary complex at 1.95 Å resolution, *Protein Sci* 12, 1822-1832.
53. Boschi-Muller, S., Azza, S., Sanglier-Cianferani, S., Talfournier, F., Van Dorsselaar, A., and Branlant, G. (2000) A sulfenic acid enzyme intermediate is involved in the catalytic mechanism of peptide methionine sulfoxide reductase from Escherichia coli, *J Biol Chem* 275, 35908-35913.
54. Ranaivoson, F. M., Antoine, M., Kauffmann, B., Boschi-Muller, S., Aubry, A., Branlant, G., and Favier, F. (2008) A structural analysis of the catalytic mechanism of methionine sulfoxide reductase A from Neisseria meningitidis, *J Mol Biol* 377, 268-280.



55. Kumar, R. A., Koc, A., Cerny, R. L., and Gladyshev, V. N. (2002) Reaction mechanism, evolutionary analysis, and role of zinc in *Drosophila* methionine-S-adenosylmethionine reductase, *J Biol Chem* 277, 37527-37535.
56. Neiers, F., Kriznik, A., Boschi-Muller, S., and Branlant, G. (2004) Evidence for a new sub-class of methionine sulfoxide reductases B with an alternative thioredoxin recognition signature, *J Biol Chem* 279, 42462-42468.
57. Tarrago, L., Laugier, E., Zaffagnini, M., Marchand, C., Le Marechal, P., Rouhier, N., Lemaire, S. D., and Rey, P. (2009) Regeneration mechanisms of *Arabidopsis thaliana* methionine sulfoxide reductases B by glutaredoxins and thioredoxins, *J Biol Chem* 284, 18963-18971.
58. Conway, M. E., Poole, L. B., and Hutson, S. M. (2004) Roles for cysteine residues in the regulatory CXXC motif of human mitochondrial branched chain aminotransferase enzyme, *Biochemistry* 43, 7356-7364.
59. Greetham, D., and Grant, C. M. (2009) Antioxidant activity of the yeast mitochondrial one-Cys peroxiredoxin is dependent on thioredoxin reductase and glutathione in vivo, *Mol Cell Biol* 29, 3229-3240.
60. Kamata, H., Honda, S., Maeda, S., Chang, L., Hirata, H., and Karin, M. (2005) Reactive oxygen species promote TNF $\alpha$ -induced death and sustained JNK activation by inhibiting MAP kinase phosphatases, *Cell* 120, 649-661.
61. Lountos, G. T., Jiang, R., Wellborn, W. B., Thaler, T. L., Bommarius, A. S., and Orville, A. M. (2006) The crystal structure of NAD(P)H oxidase from *Lactobacillus sanfranciscensis*: insights into the conversion of O<sub>2</sub> into two water molecules by the flavoenzyme, *Biochemistry* 45, 9648-9659.
62. Crane, E. J., 3rd, Vervoort, J., and Claiborne, A. (1997) <sup>13</sup>C NMR analysis of the cysteine-sulfenic acid redox center of enterococcal NADH peroxidase, *Biochemistry* 36, 8611-8618.
63. Poole, L. B., and Claiborne, A. (1989) The non-flavin redox center of the streptococcal NADH peroxidase. II. Evidence for a stabilized cysteine-sulfenic acid, *J Biol Chem* 264, 12330-12338.
64. Yeh, J. I., Claiborne, A., and Hol, W. G. (1996) Structure of the native cysteine-sulfenic acid redox center of enterococcal NADH peroxidase refined at 2.8 Å resolution, *Biochemistry* 35, 9951-9957.
65. Stehle, T., Ahmed, S. A., Claiborne, A., and Schulz, G. E. (1990) The structure of NADH peroxidase from *Streptococcus faecalis* at 3.3 Å resolution, *FEBS Lett* 267, 186-188.
66. Miyanaga, A., Fushinobu, S., Ito, K., and Wakagi, T. (2001) Crystal structure of cobalt-containing nitrile hydratase, *Biochem Biophys Res Commun* 288, 1169-1174.
67. Panmanee, W., Vattanaviboon, P., Poole, L. B., and Mongkolsuk, S. (2006) Novel organic hydroperoxide-sensing and responding mechanisms for OhrR, a major bacterial sensor and regulator of organic hydroperoxide stress, *J Bacteriol* 188, 1389-1395.
68. Fuangthong, M., and Helmann, J. D. (2002) The OhrR repressor senses organic hydroperoxides by reversible formation of a cysteine-sulfenic acid derivative, *Proc Natl Acad Sci U S A* 99, 6690-6695.

69. Lee, C., Lee, S. M., Mukhopadhyay, P., Kim, S. J., Lee, S. C., Ahn, W. S., Yu, M. H., Storz, G., and Ryu, S. E. (2004) Redox regulation of OxyR requires specific disulfide bond formation involving a rapid kinetic reaction path, *Nat Struct Mol Biol* 11, 1179-1185.
70. Pineda-Molina, E., Klatt, P., Vazquez, J., Marina, A., Garcia de Lacoba, M., Perez-Sala, D., and Lamas, S. (2001) Glutathionylation of the p50 subunit of NF-kappaB: a mechanism for redox-induced inhibition of DNA binding, *Biochemistry* 40, 14134-14142.
71. Lin, W. S., Armstrong, D. A., and Gaucher, G. M. (1975) Formation and repair of papain sulfenic acid, *Can J Biochem* 53, 298-307.
72. Headlam, H. A., Gracanin, M., Rodgers, K. J., and Davies, M. J. (2006) Inhibition of cathepsins and related proteases by amino acid, peptide, and protein hydroperoxides, *Free Radic Biol Med* 40, 1539-1548.
73. Olry, A., Boschi-Muller, S., Marraud, M., Sanglier-Cianferani, S., Van Dorsselear, A., and Branlant, G. (2002) Characterization of the methionine sulfoxide reductase activities of PILB, a probable virulence factor from *Neisseria meningitidis*, *J Biol Chem* 277, 12016-12022.
74. Nakamura, T., Yamamoto, T., Abe, M., Matsumura, H., Hagihara, Y., Goto, T., Yamaguchi, T., and Inoue, T. (2008) Oxidation of archaeal peroxiredoxin involves a hypervalent sulfur intermediate, *Proc Natl Acad Sci U S A* 105, 6238-6242.
75. Monteiro, G., Horta, B. B., Pimenta, D. C., Augusto, O., and Netto, L. E. (2007) Reduction of 1-Cys peroxiredoxins by ascorbate changes the thiol-specific antioxidant paradigm, revealing another function of vitamin C, *Proc Natl Acad Sci U S A* 104, 4886-4891.
76. van Montfort, R. L., Congreve, M., Tisi, D., Carr, R., and Jhoti, H. (2003) Oxidation state of the active-site cysteine in protein tyrosine phosphatase 1B, *Nature* 423, 773-777.
77. Raftery, M. J., Yang, Z., Valenzuela, S. M., and Geczy, C. L. (2001) Novel intra- and inter-molecular sulfinamide bonds in S100A8 produced by hypochlorite oxidation, *J Biol Chem* 276, 33393-33401.
78. Poor, C. B., Chen, P. R., Duguid, E., Rice, P. A., and He, C. (2009) Crystal structures of the reduced, sulfenic acid, and mixed disulfide forms of SarZ, a redox active global regulator in *Staphylococcus aureus*, *J Biol Chem* 284, 23517-23524.
79. Legler, P. M., Kumaran, D., Swaminathan, S., Studier, F. W., and Millard, C. B. (2008) Structural characterization and reversal of the natural organophosphate resistance of a D-type esterase, *Saccharomyces cerevisiae* S-formylglutathione hydrolase, *Biochemistry* 47, 9592-9601.
80. Michalek, R. D., Nelson, K. J., Holbrook, B. C., Yi, J. S., Stridiron, D., Daniel, L. W., Fetrow, J. S., King, S. B., Poole, L. B., and Grayson, J. M. (2007) The requirement of reversible cysteine sulfenic acid formation for T cell activation and function, *J Immunol* 179, 6456-6467.
81. Race, P. R., Bentley, M. L., Melvin, J. A., Crow, A., Hughes, R. K., Smith, W. D., Sessions, R. B., Kehoe, M. A., McCafferty, D. G., and Banfield, M. J. (2009) Crystal structure of *Streptococcus pyogenes* sortase A: implications for sortase mechanism, *J Biol Chem* 284, 6924-6933.

82. Willett, W. S., and Copley, S. D. (1996) Identification and localization of a stable sulfenic acid in peroxide-treated tetrachlorohydroquinone dehalogenase using electrospray mass spectrometry, *Chem Biol* 3, 851-857.
83. Arakawa, T., Kawano, Y., Katayama, Y., Nakayama, H., Dohmae, N., Yohda, M., and Odaka, M. (2009) Structural basis for catalytic activation of thiocyanate hydrolase involving metal-ligated cysteine modification, *J Am Chem Soc* 131, 14838-14843.
84. Arakawa, T., Kawano, Y., Kataoka, S., Katayama, Y., Kamiya, N., Yohda, M., and Odaka, M. (2007) Structure of thiocyanate hydrolase: a new nitrile hydratase family protein with a novel five-coordinate cobalt(III) center, *J Mol Biol* 366, 1497-1509.
85. Baker, L. M., and Poole, L. B. (2003) Catalytic mechanism of thiol peroxidase from *Escherichia coli*. Sulfenic acid formation and overoxidation of essential CYS61, *J Biol Chem* 278, 9203-9211.
86. Xu, Z., Lam, L. S., Lam, L. H., Chau, S. F., Ng, T. B., and Au, S. W. (2008) Molecular basis of the redox regulation of SUMO proteases: a protective mechanism of intermolecular disulfide linkage against irreversible sulfhydryl oxidation, *FASEB J* 22, 127-137.
87. Denu, J. M., and Tanner, K. G. (1998) Specific and reversible inactivation of protein tyrosine phosphatases by hydrogen peroxide: evidence for a sulfenic acid intermediate and implications for redox regulation, *Biochemistry* 37, 5633-5642.
88. Wilson, M. A., Ringe, D., and Petsko, G. A. (2005) The atomic resolution crystal structure of the YajL (ThiJ) protein from *Escherichia coli*: a close prokaryotic homologue of the Parkinsonism-associated protein DJ-1, *J Mol Biol* 353, 678-691.
89. Depuydt, M., Leonard, S. E., Vertommen, D., Denoncin, K., Morsomme, P., Wahni, K., Messens, J., Carroll, K. S., and Collet, J. F. (2009) A periplasmic reducing system protects single cysteine residues from oxidation, *Science* 326, 1109-1111.
90. Gurmu, D., Lu, J., Johnson, K. A., Nordlund, P., Holmgren, A., and Erlandsen, H. (2009) The crystal structure of the protein YhaK from *Escherichia coli* reveals a new subclass of redox sensitive enterobacterial bicupins, *Proteins* 74, 18-31.
